# Supplementary figures and images for: Adenosine diphosphate restricts the protein remodeling activity of the Hsp104 chaperone to Hsp70 assisted disaggregation
Source: eLife journal article supplement (doi:10.7554/elife.15159), 2016-05-25

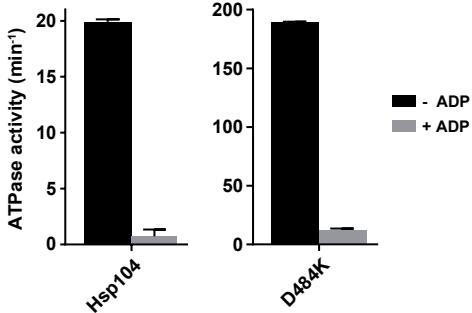

Supplement: supp [file elife-15159-supp-v1.zip]

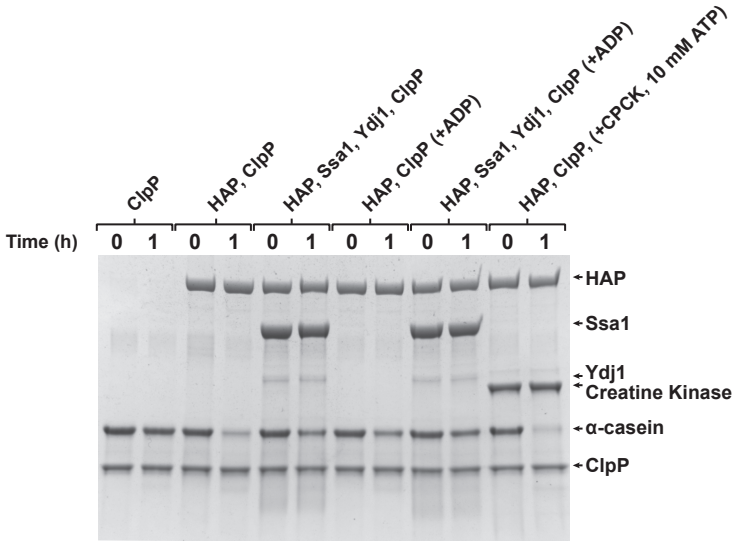

Supplement: supp [file elife-15159-supp-v1.zip]

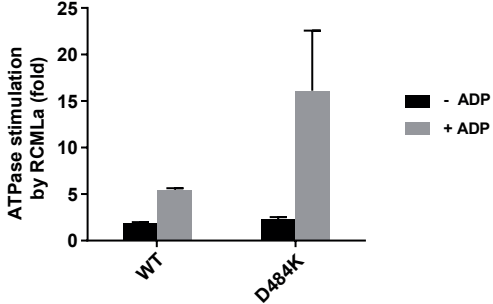

Supplement: supp [file elife-15159-supp-v1.zip]

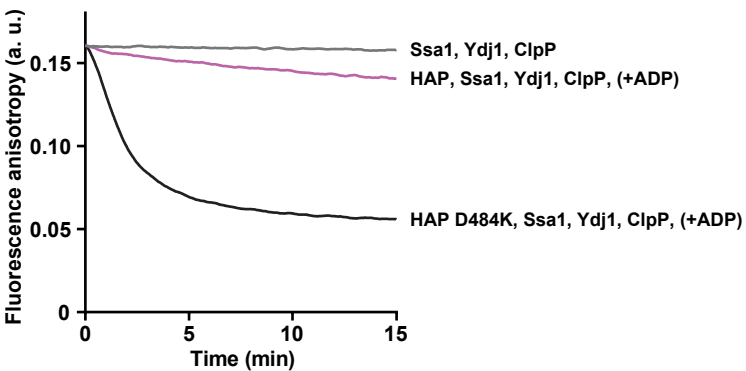

Supplement: supp [file elife-15159-supp-v1.zip]

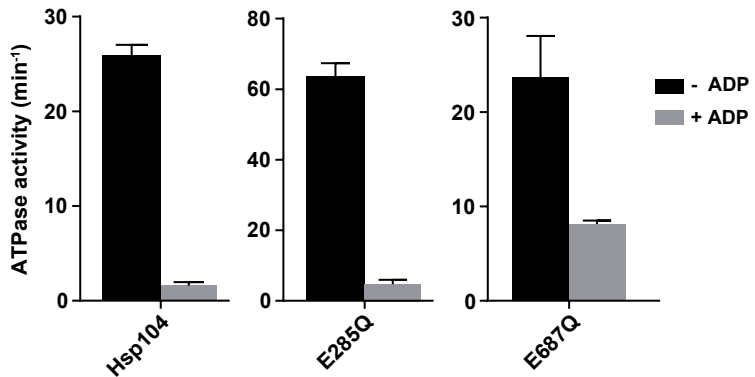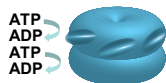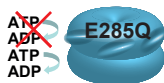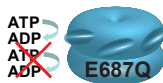

Supplement: supp [file elife-15159-supp-v1.zip]

**A**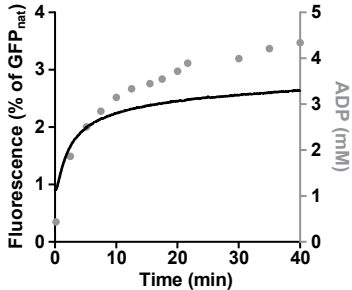**B**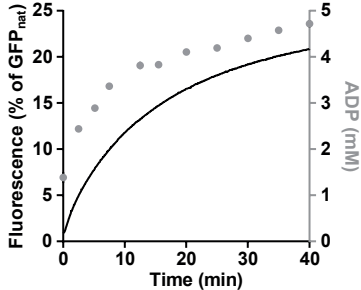

Supplement: supp [file elife-15159-supp-v1.zip]

**A**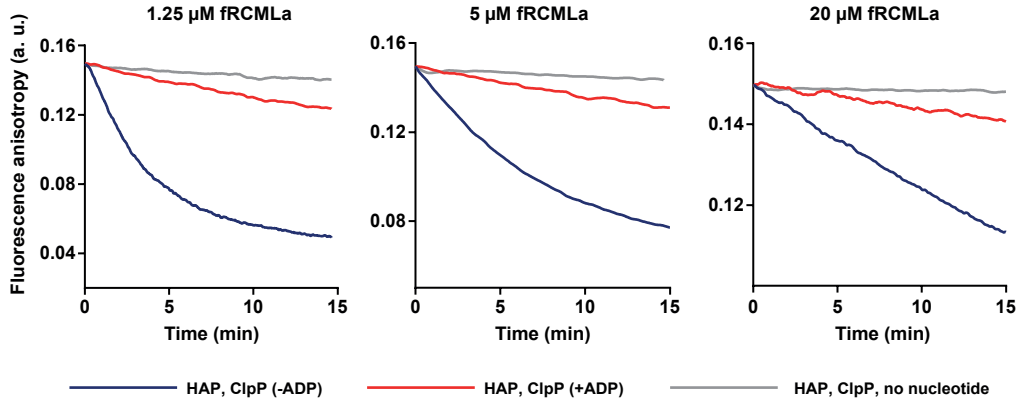**B**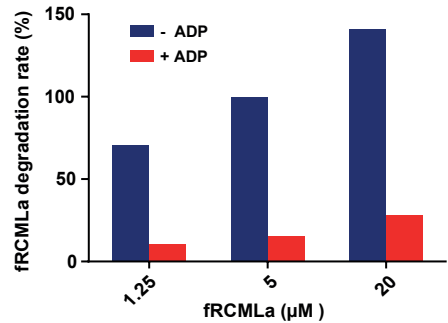

Supplement: supp [file elife-15159-supp-v1.zip]

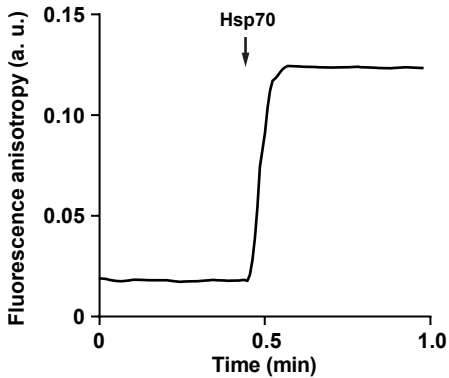

Supplement: supp [file elife-15159-supp-v1.zip]

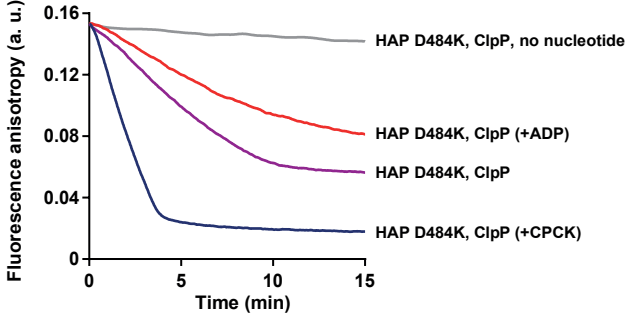

Supplement: supp [file elife-15159-supp-v1.zip]

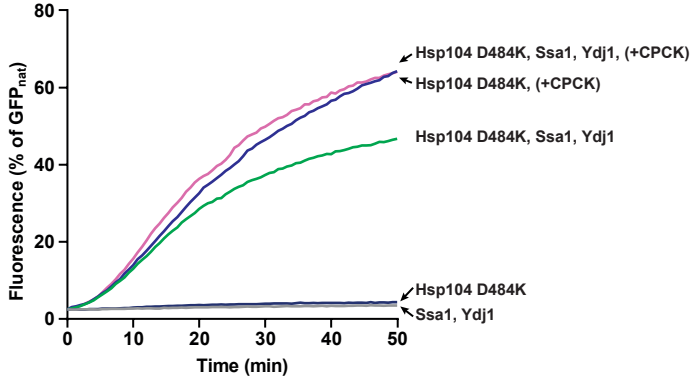

Supplement: supp [file elife-15159-supp-v1.zip]
